# Supplementary material for: CXCL5‐CXCR2 signaling is a senescence‐associated secretory phenotype in preimplantation embryos
Source: PubMed Central journal article supplement (PMC7576282; doi:10.1111/acel.13240), 2020-09-22
Supplement: ACEL-19-e13240-s001.pdf [file ACEL-19-e13240-s001.pdf]

**Figure\_S1**

**(A)**

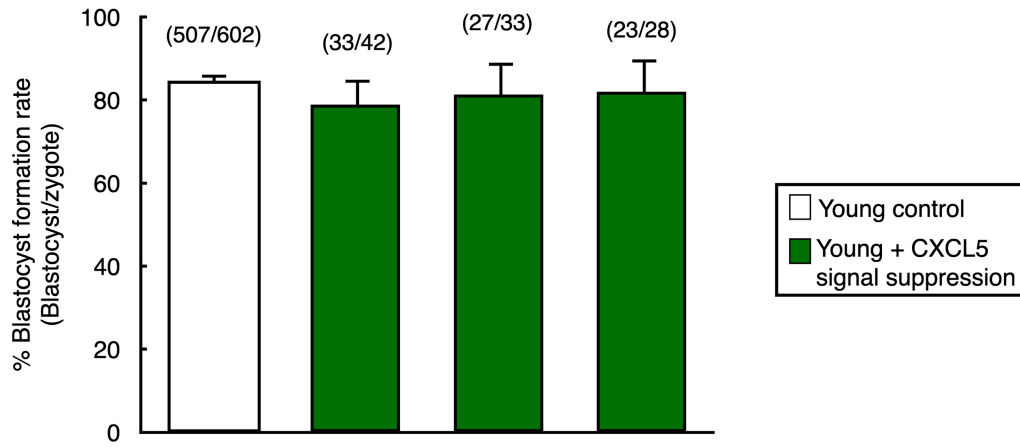

| CXCL5 Antibody (µg/ml) | 0 | 10 | 0  | 10 |
|------------------------|---|----|----|----|
| CXCR2 Antagonist (nM)  | 0 | 0  | 10 | 10 |

**(B)**

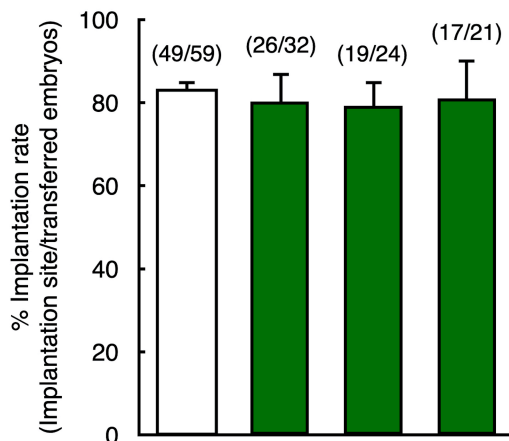

| CXCL5 Antibody (µg/ml) | 0 | 10 | 0  | 10 |
|------------------------|---|----|----|----|
| CXCR2 Antagonist (nM)  | 0 | 0  | 10 | 10 |

**(C)**

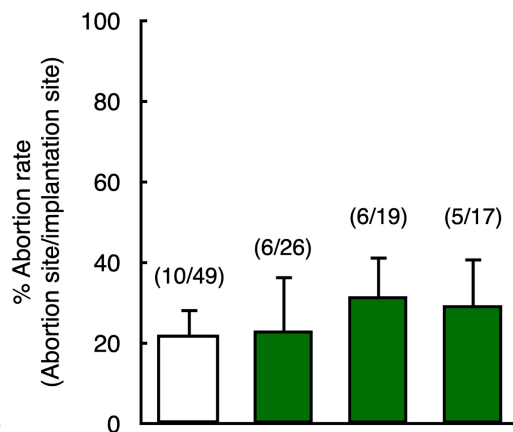

| CXCL5 Antibody (µg/ml) | 0 | 10 | 0  | 10 |
|------------------------|---|----|----|----|
| CXCR2 Antagonist (nM)  | 0 | 0  | 10 | 10 |

**(D)**

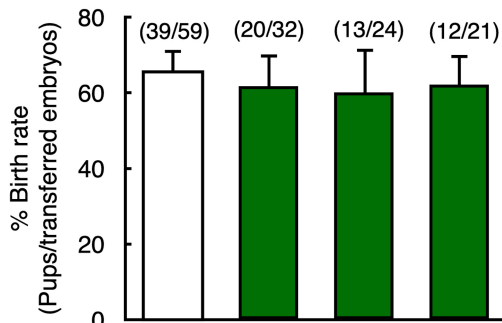

| CXCL5 Antibody (µg/ml) | 0 | 10 | 0  | 10 |
|------------------------|---|----|----|----|
| CXCR2 Antagonist (nM)  | 0 | 0  | 10 | 10 |
