# Supplementary material for: CXCL5‐CXCR2 signaling is a senescence‐associated secretory phenotype in preimplantation embryos
Source: PubMed Central journal article supplement (PMC7576282; doi:10.1111/acel.13240), 2020-09-22
Supplement: ACEL-19-e13240-s002.pdf [file ACEL-19-e13240-s002.pdf]

**Table S1. Sequences for the primers used for quantitative RT-PCR analysis.**

| Species           | Gene              | Oligonucleotide Sequence ( 5' → 3') |                           |
|-------------------|-------------------|-------------------------------------|---------------------------|
| Mouse             | <i>Cxcl5</i>      | Forward                             | GCATTTCTGCTGCTGTTCACT     |
|                   |                   | Reverse                             | GGTTAAGCAAACACAGCGTAGCT   |
|                   | <i>Cxcr2</i>      | Forward                             | TCCTAACACTAGACCCCAAACACTC |
|                   |                   | Reverse                             | TTTCTCTCCTCCACCTCTTCCTT   |
|                   | <i>P16</i>        | Forward                             | GCGTGTCTAGCATGTGGCTTT     |
|                   |                   | Reverse                             | TCCTTCTGCTCCCTCCCTCT      |
|                   | <i>P21</i>        | Forward                             | AATACCGTGGGTGTCAAAGCA     |
|                   |                   | Reverse                             | AGGGAGGGAGCCACAATACA      |
|                   | <i>P53</i>        | Forward                             | GATGCCCATGCTACAGAGGAG     |
|                   |                   | Reverse                             | ACAGAAAAGGGGAGGGATGAA     |
|                   | <i>Pai-1</i>      | Forward                             | TTCCTCTCACTTCCACCCAAA     |
|                   |                   | Reverse                             | AGCAACAGCAACAGAAACAACAC   |
|                   | <i>Il-6</i>       | Forward                             | CACCAAGAACGATAGTCAATTCCA  |
|                   |                   | Reverse                             | TCACCAGCATCAGTCCCAAG      |
| <i>Histon H2a</i> | Forward           | GCTTGCTATACGTGGAGATGAAGA            |                           |
|                   | Reverse           | AGCGATTTGTGGATGTGTGG                |                           |
| <i>β-actin</i>    | Forward           | AGGGAGGGAGCCACAATACA                |                           |
|                   | Reverse           | AGGGAGGGAGCCACAATACA                |                           |
| Human             | <i>CXCL5</i>      | Forward                             | CCACTATGAGCCTCCTGTCC      |
|                   |                   | Reverse                             | CAACGCAGCTCTCTCAACAC      |
|                   | <i>HISTON H2A</i> | Forward                             | GCTTGCTATACGTGGAGATGAAGA  |
|                   |                   | Reverse                             | AGCGATTTGTGGATGTGTGG      |
